# Supplementary material for: Human iPSC-Derived Vascular Smooth Muscle Cells in a Fibronectin Functionalized Collagen Hydrogel Augment Endothelial Cell Morphogenesis
Source: MDPI journal article supplement (doi:10.3390/bioengineering8120223), 2021-12-18
Supplement: s1 [file s1]

## Article

# Human iPSC-Derived Vascular Smooth Muscle Cells in a Fibronectin Functionalized Collagen Hydrogel Augment Endothelial Cell Morphogenesis

Kaiti Duan <sup>1,†</sup>, Biraja C. Dash <sup>1,\*,†</sup>, Daniel C. Sasson <sup>1</sup>, Sara Islam <sup>1</sup>, Jackson Parker <sup>1</sup> and Henry C. Hsia <sup>1,2,\*</sup>

<sup>1</sup> Section of Plastic Surgery, Department of Surgery Yale School of Medicine, Yale University, New Haven, CT 06510, USA; kaiti.duan@yale.edu (K.D.); dcsasson@gmail.com (D.C.S.); sara.islam@yale.edu (S.I.); jackson.parker@yale.edu (J.P.)

<sup>2</sup> Department of Biomedical Engineering, Yale University, New Haven, CT 06511, USA

\* Correspondence: biraja.dash@yale.edu (B.C.D.); henry.hsia@yale.edu (H.C.H.); Tel.: +1-203-737-2049 (H.C.H.)

† Equal Contribution.

**Running Title: hiPSC-VSMC Promotes EC Morphogenesis**

## Supplementary Materials:

Vascular smooth muscle cell (SmGM-2) and endothelial cell (EGM-2) growth media are purchased from Promocell, Germany. Type-I collagen from Enzo Life Sciences, USA; mTESR medium and dispase from STEMCELL Technologies; human plasma fibronectin from Millipore Sigma; Echistatin from R&D Systems; Ultra-low attachment and ELISA (NUNC) plates from Thermo Fisher Scientific; matrigel from Corning; TMB substrate from Abcam; and AlamarBlue from Thermo Fisher Scientific. All other reagents and laboratory supplies were purchased from Thermo Fisher Scientific, USA.

**Table S1.** Information related to primary antibodies.

| Primary Antibody | Dilution     | Catalog Number/ Manufacturer |
|------------------|--------------|------------------------------|
| bFGF             | 1:2500 ELISA | 500M38 (PeproTech)           |
| VEGF             | 1:2500 ELISA | AB-119 (Abcam)               |
| SM-22α           | 1:200 IF     | AB-10135 (Abcam)             |
| CD31             | 1:200 IF     | sc-376764 (Santacruz)        |
| CD144            | 1:200 IF     | sc-9989 (Santacruz)          |

**Table S2.** Information related to secondary antibodies.

| Secondary Antibody       | Dilution     | Catalog Number/ Manufacturer |
|--------------------------|--------------|------------------------------|
| Anti-Mouse-HRP           | 1:2500 ELISA | AB6789 (Abcam)               |
| Anti-Mouse-Alexafluor488 | 1:250 IF     | A21202 (ThermoFisher)        |
| Anti-Goat-Alexafluor555  | 1:250 IF     | A21432 (ThermoFisher)        |
